# Supplementary material for: Enzyme mimics of bimetallic nanoclusters for detection of trypsin
Source: Research Square preprint supplement (doi:10.21203/rs.3.rs-6373736/v1), 2025-05-06
Supplement: Supplementary file 2 [file ef007cfd8bdf15551eac43cc.docx]

Supplementary information for

**Enzyme mimics of bimetallic nanoclusters for detection of trypsin**


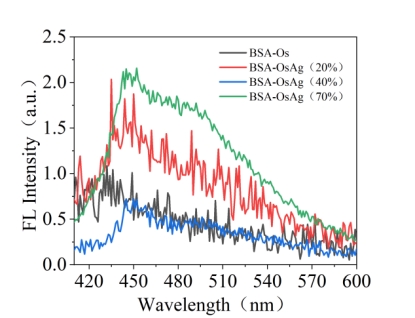


**Fig. S1.** Fluorescence spectra of BSA-OsAg nanoclusters with different silver contents.

**Table. S1** The highest absorption value of different samples at 652 nm.

| Catalyst | A652nm（a.u.） |
| --- | --- |
| BSA-Os | 2.289 |
| BSA-OsAg（20% Ag） | 2.351 |
| BSA-OsAg（40% Ag） | 2.276 |
| BSA-OsAg（70% Ag） | 0.349 |


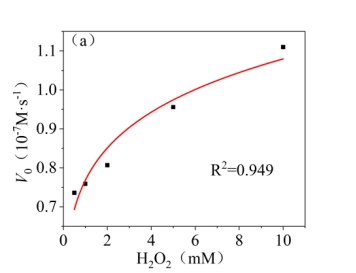

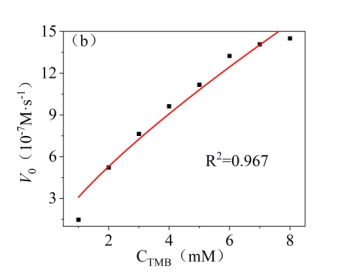


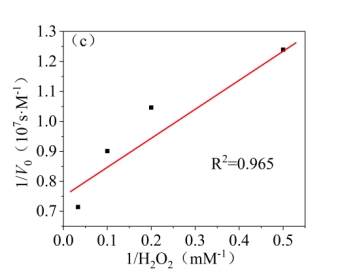

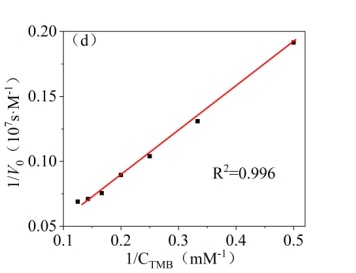


**Fig. S2.** Steady-state kinetic analysis with BSA-Os NCs, Michaelis-Menten trend of (a) H2O2 and (b) TMB, Lineweaver-Burk plot of (c) H2O2 and (d) TMB.


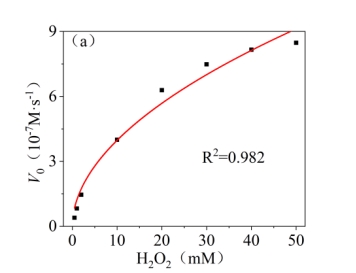

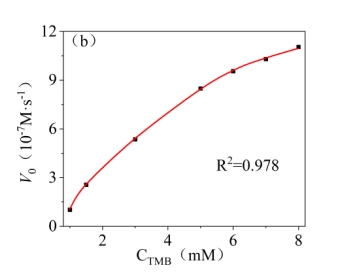


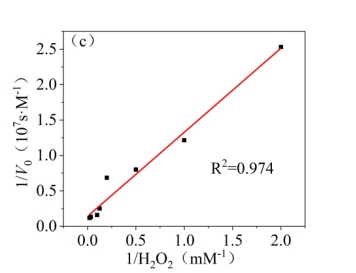

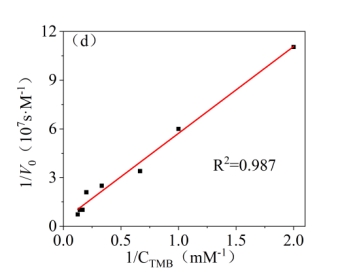


**Fig. S3.** Steady-state kinetic analysis with BSA-Os NCs with 40% silver content, Michaelis-Menten trend of (a) H2O2 and (b) TMB, Lineweaver-Burk plot of (c) H2O2 and (d) TMB.


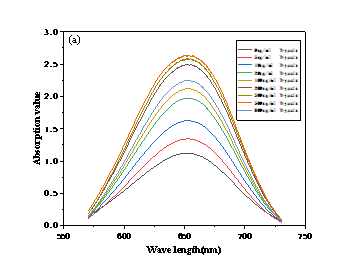

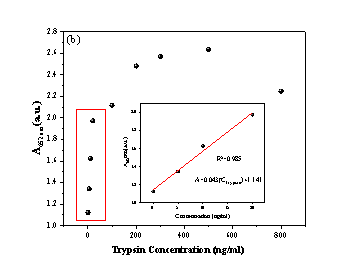


**Fig. S4.** (a)UV-Vis spectrum of trypsin at different concentrations , (b) absorption values and fitting plots of trypsin at 652nm at different concentrations
