# Supplementary figures and images for: Enzyme mimics of bimetallic nanoclusters for detection of trypsin
Source: Research Square preprint supplement (doi:10.21203/rs.3.rs-6373736/v1), 2025-05-06

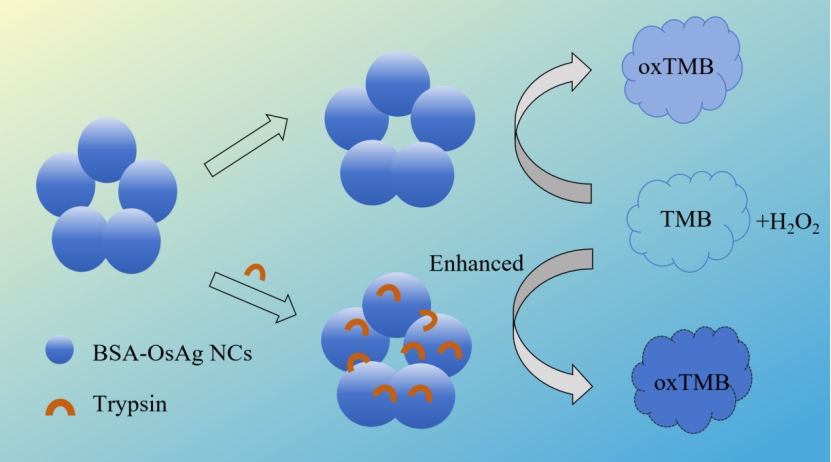


Scheme illustration for the detection of trypsin by using BSA-OsAg NCs.

Supplement: Supplementary file 1 [file e744f88263c79c1c55ce510f.docx]
